1    DPSN: standardizing the short names of amplicon-sequencing primers to avoid ambiguity

2

3    Yuxiang Tan<sup>#1</sup>, Yixia Tian<sup>#1</sup>, Junyu Chen<sup>2</sup>, Zhinan Yin<sup>1</sup>, Hengwen Yang<sup>\*1</sup>

4

5    <sup>1</sup> The First Affiliated Hospital, Biomedical Translational Research Institute, Guangdong Province

6    Key Laboratory of Molecular Immunology and Antibody Engineering, Jinan University,

7    Guangzhou 510632, China

8    <sup>2</sup> Shenzhen Institute of Synthetic Biology, Shenzhen Institutes of Advanced Technology, Chinese

9    Academy of Sciences, Shenzhen 518055, People's Republic of China

10    <sup>#</sup> These authors contributed equally

11

12    <sup>\*</sup> Corresponding authors: Dr. Hengwen Yang [benyang97@gmail.com](mailto:benyang97@gmail.com). Tel/ Fax: +86-020-85222787

13

## 14 **Abstract**

15 **Background:** Amplicon sequencing is the most widely used sequencing method to evaluate  
16 microbial diversity in virtually all environments. Thus, appropriate and specific primers are needed  
17 to amplify amplicon regions in amplicon sequencing. For this purpose, the community currently  
18 uses probeBase, which curates rRNA-targeted probes and primers. **Main Body:** We found that 63.58%  
19 of the primers in probeBase have problematic issues in the short name, full name, and/or position.  
20 Furthermore, the current convention for short names causes ambiguity. We here introduce our new  
21 Database of Primer Scientific Names (DPSN), which is a manually curated database for the 173  
22 primers in probeBase complete with a new short name convention. Building on the work of  
23 probeBase, we provide a more user-friendly and standardized system. The new short primer naming  
24 convention has three basic components: 5' position on the sense strand, version, and direction. An  
25 additional character for the name of the taxonomic group is also added in front of the name for  
26 convenient use. Furthermore, DPSN contains primers for large subunit as well. In order to separate  
27 them from the primers for small subunit, a header character is also recommended. **Conclusion:** All  
28 173 primers in probeBase were corrected according to this new rule, and are stored in DPSN, which

29 is expected to facilitate accurate primer selection and better standardized communication in this

30 field.

31 **Database URL:** The DPSN database is available in a user-interactive website at

32 <http://dpsn.gdimunity.com>

33 Keywords: database, scientific name, amplicon, primer

34

## 35 **Background**

36        Amplicon sequencing is a common sequencing method for microbial research from diverse  
37 environmental or clinical samples [1, 2]. Amplicon sequencing is dependent on the choice of primers  
38 for carrying out the amplification step. Thus, selection of the most appropriate primers is the  
39 foundation of successful amplicon sequencing.

40        probeBase [3] is the only database currently available with updated lists of probes and primers,  
41 along with links to other databases providing related information. At present, there is a total of 173  
42 primers recorded in probeBase. In general, a primer is defined according to its short name (SN), full  
43 name (FN), and sequence. However, in many cases, only the SN is used for the sake of convenience.  
44 There are seven components of an FN [4]. Taking S-D-Bact-0338-a-A-18 as an example: “S” stands  
45 for the target gene (Small Sub-Unit (SSU)), “D” represents the largest taxonomic group targeted  
46 (Domain), “Bact” is the name of the taxonomic group (Bacteria), “0338” is the 5' position of the  
47 sense strand, “a” presents the version, “A” denotes the identical strand (“S” for sense; “A” for  
48 antisense), and “18” is the length of the primer. To avoid ambiguity, each primer should have a  
49 unique SN; however, this is not the case. Different from FN, there is no guideline for how an SN

50 should be. Therefore, SNs were named in a few different ways, such as Primer3, Bac927, 926r, and  
51 934mcr. The most common ones were composited by the position and direction (for example, 926r),  
52 or with an additional string for the name of the taxonomic group (for example, Arch 915r). The lack  
53 of clear rules and sufficient information for accuracy leads to ambiguity of SNs.

54 In fact, there are 14 SNs that refer to multiple primer sequences, which could lead to confusion  
55 and cause several problems in application for users. For example, in the earth microbiome project  
56 website [1], the author of the citation for a given primer is used along with the SN to better specify  
57 the primer. Furthermore, the SN itself could be misleading. For example, primers 907r and 926r are  
58 actually from the same region of the genome but with a difference of two bases in the sequence.  
59 However, based on their SNs alone, a user would misinterpret these primers as being derived from  
60 two different regions.

61 To resolve this problem, we here introduce Database of Primer Scientific Names (DPSN),  
62 which is a database that has been manually curated to correct problematic and inconsistent features  
63 (SN, FN, position, and length) of primers in probeBase according to an improved convention of  
64 naming SNs. The new SNs still correspond to the old SNs and corrected FNs in a one-to-one relation.

## 65 **Construction and content**

### 66 **Data source**

67 Information of all 173 primers in the probeBase dataset was manually extracted [3], including  
68 the SN, FN, position, sequence, length, G+C content, and dissociation temperature.

69 The corresponding regions on the reference sequence of *Escherichia coli* K-12 substrain  
70 MG1655 was extracted from the SILVA database [5] and served as the reference for confirming the  
71 sequence position.

### 72 **Derivation of new SN naming convention**

73 A unique SN should have at least three basic components to provide sufficient identifying  
74 information: 5' position on the sense strand, version, and direction.

75 In the old SN, such as 907r, all reverse primers that start or end from position 907 will have  
76 the same name, which leads to ambiguity. Therefore, including additional information of the version,  
77 such as 907ar to indicate the version, could help to specify the primer sequence. Consistent with the  
78 old SN rule, “F” and “r” denote “forward primer” and “reverse primer,” respectively. Moreover,

79 because the name of the taxonomic group provides helpful information for users to select  
80 appropriate primers, DPSN also includes a shorthand for the name of the taxonomic group (“A” for  
81 Archaea, “B” for Bacteria, “U” for universal, and “N” for nano) in front of the SN. Additionally, on  
82 account of the need to separate SSU primers from large subunit (LSU) primers, the header represents  
83 of target get from the FNs is retained. For instance, the SN 907ar represents the FN “S-D-Bact-  
84 0907-a-A-20”, which was corrected and recorded as S-B907ar in DPSN.

#### 85 **Amplification range validation of the primers**

86 To validate the amplification location of primers according to the *E. coli* K-12 reference, BLAT  
87 of the National Center for Biotechnology Information [6] was employed as the aligner. However,  
88 because of the presence of degenerate bases in primer sequences, the primers had to be converted  
89 into expanded regular sequences, which was achieved using a customized Python script before  
90 BLAT alignment. In particular, the additional parameters “-minMatch = 1-minScore = 8-minIdentity  
91 = 70-stepSize = 1-tileSize = 8” were applied to BLAT, considering the length and mismatch tolerance  
92 of primers.

93 To confirm the amplification location, the primers were also checked by the TestProbe function

94 in SILVA [5].

95

## 96 **Utility and Discussion**

### 97 **How to use DPSN**

98 In order to make the search easy, DPSN supports fuzzy search on all the fields. This means  
99 user can use any keyword to find the related primer(s), such as the intended 5' position and the sub-  
100 string of the primer sequence. In return, DPSN will present the corrected information of the related  
101 primers. As well as the original "Short Name" and "Full Name" from the probeBase, which will  
102 help the user to connect the use of the primers in original papers. All the sequence in DPSN are the  
103 same as the ones in probeBase.

### 104 **Summary of Corrections and Discussion**

105 Our careful review of probeBase identified five sequences with multiple primer names, 14  
106 groups of SNs with multiple targets, and 91 SNs inconsistent with their FNs. Of the total 173 primers  
107 in probeBase, the SNs for only 63 primers (36.42%) could direct the user to a unique sequence and



108 be considered as correct. Five sequences were multifold and had multiple primer names (Table 1).  
109 Thirty SNs from 14 groups pointed to more than one sequence. The positions in 91 SNs were  
110 different from the 5' position of their FNs. Overall, the positions of 35 primers in probeBase were  
111 found to be incorrect.

112 In addition, a few FNs were found to be incorrect in probeBase, which have been manually  
113 corrected in DPSN. Theoretically, the FNs of primers should be unique, since a single FN represents  
114 a unique primer sequence. However, in probeBase, three FNs were duplicated and even represented  
115 more than one sequence (Table 2). In the naming rule, the position in an FN is based on the 5'  
116 position; however, eight of the primers in probeBase violated this rule (Table 3). Even more  
117 importantly, the length information of five FNs did not match the actual lengths of their sequences  
118 (Table 4), and the directions of three primers were opposite to the actual direction of their sequences  
119 (Table 5).

120 **Table 2: Primer groups with the same FN in probeBase**

| Old SN    | Old FN               | Position | Sequence            | GC% | TM*  |
|-----------|----------------------|----------|---------------------|-----|------|
| Arch958f  | S-D-Arch-0958-a-S-19 | 958–975  | AATTGGANTCAACGCCGG  | 50  | 49   |
| Arch958Bf | S-D-Arch-0958-a-S-19 | 958–976  | AATTGGABTCAACGCCGGR | 47  | 51.5 |

|       |                      |         |                     |    |    |
|-------|----------------------|---------|---------------------|----|----|
| b785  | S-D-Bact-0785-a-A-19 | 785–803 | CTACCAGGGTATCTAATCC | 47 | 49 |
| 803r  | S-D-Bact-0785-a-A-19 | 785–803 | CTACCRGGGTATCTAATCC | 47 | 50 |
| 518r  | S-D-Bact-0518-a-A-17 | 518–534 | ATTACCGCGGCTGCTGG   | 65 | 52 |
| P518r | S-D-Bact-0518-a-A-17 | 518–534 | ATTACCGCGGCTGCTGG   | 65 | 52 |

121 \*TM: dissociation temperature (°C)

122 **Table 3: FNs of primers with inconsistent positions in probeBase**

| Old SN   | Old FN               | Position | Sequence                  | GC% | TM* |
|----------|----------------------|----------|---------------------------|-----|-----|
| 338      | S-D-Bact-0338-a-A-19 | 337–355  | TGCTGCCTCCCGTAGGA<br>GT   | 63  | 58  |
| 1114mcr  | S-P-Nano-1082-a-A-17 | 915–931  | GGGTCTCGCCTGTTTCC         | 65  | 52  |
| 27F      | S-D-Bact-0008-d-S-20 | 6–25     | AGAGTTTGATCMTGGCT<br>CAG  | 45  | 51  |
| 63F      | S-D-Bact-0043-s-S-21 | 21–41    | CAGGCCTAACACATGCA<br>AGTC | 52  | 52  |
| Arch855R | S-D-Arch-0896-a-A-20 | 915–934  | TCCCCCGCCAATTCCTTT<br>AA  | 50  | 52  |

|                 |                          |         |                          |    |    |
|-----------------|--------------------------|---------|--------------------------|----|----|
| bio-pJBS-V3.SER | S-D-Bact-0947-a-<br>A-20 | 946–965 | GGTAAGGTTCTTCGCGT<br>TGC | 55 | 53 |
| Primer3         | S-D-Bact-0518-c-<br>A-17 | 340–357 | GCCTACGGGAGGCAGCA<br>G   | 72 | 57 |
| Primer2         | S-D-Bact-0340-a-<br>A-18 | 518–534 | ATTACCGCGGCTGCTGG        | 65 | 52 |

123 \*TM: dissociation temperature (°C)

124

125 **Table 4: FNs of primers with the wrong length in probeBase**

| Old SN   | Old FN                   | Position | Sequence               | GC% | TM*  | Corrected length |
|----------|--------------------------|----------|------------------------|-----|------|------------------|
| Uni522r  | S-*-Univ-0517-a-A-<br>15 | 517–534  | GWATTACCGCG<br>GCKGCTG | 61  | 54   | 18               |
| Primer2  | S-D-Bact-0340-a-A-<br>18 | 518–534  | ATTACCGCGGC<br>TGCTGG  | 65  | 52   | 17               |
| U529r    | S-*-Univ-0522-a-A-<br>18 | 522–536  | ACCGCGGCKGC<br>TGGC    | 80  | 54.5 | 15               |
| Primer3  | S-D-Bact-0518-c-A-<br>17 | 340–357  | GCCTACGGGAG<br>GCAGCAG | 72  | 57   | 18               |
| Arch958f | S-D-Arch-0958-a-S-<br>19 | 958–975  | AATTGGANTCA<br>ACGCCGG | 50  | 49   | 18               |

126 \*TM: dissociation temperature (°C)

127

128

129

**Table 5: FNs of primers with the wrong strand in probeBase**

| Old SN  | Old FN                   | Position | Sequence               | GC% | TM<br>* | Corrected FN             |
|---------|--------------------------|----------|------------------------|-----|---------|--------------------------|
| Primer3 | S-D-Bact-0518-<br>c-A-17 | 340–357  | GCCTACGGGAGG<br>CAGCAG | 72  | 57      | S-D-Bact-0340-a-<br>S-18 |
| 527f    | S-D-Bact-0517-<br>a-S-16 | 517–532  | ACCGCGGCCCKGC<br>TGGC  | 81  | 66      | S-D-Bact-0517-a-<br>A-16 |
| 536r    | S-D-Bact-0519-<br>a-A-18 | 519–536  | CAGCMGCCGCG<br>GTAATWC | 61  | 54      | S-D-Bact-0519-a-<br>S-18 |

130

\*TM: dissociation temperature (°C)

131

In DPSN, all of the SNs of the primers in probeBase have been updated according to the new

132

naming rule along with additional version information to provide a more unique identifier that is

133

still convenient to use. Overall, 110 problematic primers were corrected. Using the amended primer

134

name in DPSN, users can simply refer to the SN to specify a primer, because of the one-to-one

135

relation among the SN, FN, and sequence, and without the inconvenience of appending additional

136

information such as author name or sequence in the article.

## 137 **Conclusion**

138       In conclusion, because it is crucial to avoid vagueness in scientific research, the old SN system  
139 of primers is problematic and should be replaced by the new naming rule as proposed herein. All of  
140 these corrections have been curated in DPSN to improve searching convenience and accuracy.  
141 Therefore, with DPSN, users can easily search an old name from probeBase or articles for its  
142 amended name. For new articles, it is recommended that authors use the amended name to  
143 accurately describe a primer.

144       DPSN currently focuses on only primers for amplicon sequencing on SSU and LSU, and thus  
145 it can be assumed that the ambiguity problem still exists for primers in other amplicon regions, such  
146 as ITS. Because the primers for these regions were not found in probeBase, we can collect and  
147 import these primers into the naming system in DPSN in the future. To keep the database up to date,  
148 DPSN accepts data submission of primers from researchers as well.

## 149 **Abbreviations**

150 **DPSN:** Database of Primers' Scientific Names   **SN:** short name   **FN:** full name

## 151 **Declarations**

### 152 **Ethics approval and consent to participate**

153 Not applicable

### 154 **Consent for publication**

155 Not applicable

### 156 **Availability of data and material**

157 Database Name: Database of Primers' Scientific Names (DPSN)

158 Database URL: <http://dpsn.gdimunity.com>

### 159 **Competing interests**

160 The authors declare that they have no competing interests.

### 161 **Funding**

162 This work was supported by the Science and Technology Department of Guangdong Province of

163 China (grant no. 2017A030310179 to Dr. Yuxiang Tan); The Major International Joint Research

164 Program of China (grant no. 31420103901), and the “111 project” (grant no. B16021) to Dr. Zhinan  
165 Yin and Hengwen Yang. The three grants supported the whole study through design and collection,  
166 analysis and interpretation of data and in writing the manuscript.

#### 167 **Authors’ contributions**

168 YuT conceived of the idea, conducted the analysis, and wrote the manuscript. YiT performed the  
169 data collection. JC provided data of LSU primers. HY and ZY supervised the project and  
170 participated in the revision of the manuscript. All authors read and approved the final manuscript.

#### 171 **Acknowledgements**

172 We would like to thank Becky Kusko for editing suggestions and Editage ([www.editage.com](http://www.editage.com)) for  
173 English language editing.

#### 174 **References**

- 175 1. Gilbert JA, Jansson JK, Knight R. The Earth Microbiome project: successes and aspirations.  
176 BMC Biol. 2014;12:69.
- 177 2. The Human Microbiome Project Consortium. A framework for human microbiome research.  
178 Nature 2012;486:215-21.

- 179 3. Greuter D, Loy A, Horn M, Rattei T. probeBase—an online resource for rRNA-targeted  
180 oligonucleotide probes and primers: new features. *Nucleic Acids Res.* 2016;44:D586-9.
- 181 4. Klindworth A, Pruesse E, Schwwer T, Peplies J, Quast C, Horn M, et al. Evaluation of general  
182 16S ribosomal RNA gene PCR primers for classical and next-generation sequencing-based  
183 diversity studies. *Nucleic Acids Res.* 2013;41:e1.
- 184 5. Quast C, Pruesse E, Yilmaz P, Gerken J, Schwwer T, Yarza P, Peplies J, Glöckner FO. The  
185 SILVA ribosomal RNA gene database project: improved data processing and web-based tools.  
186 *Nucleic Acids Res.* 2013;41:D590-6.
- 187 6. Kent WJ. BLAT--the BLAST-like alignment tool. *Genome Res.* 2002;12:656-4.  
188



**Table 1: Primer groups with the same sequence in probeBase**

| Old SN        | Old FN                   | Position | Sequence                | GC% | TM*  | Corr. SN | Corr. FN                         |
|---------------|--------------------------|----------|-------------------------|-----|------|----------|----------------------------------|
| Arch95<br>8Bf | S-D-Arch-<br>0938-b-S-19 | 938–956  | AATTGGABTCA<br>ACGCCGGR | 47  | 51.5 | A958bf   | S-D-<br>Arch-<br>0958-b-S-<br>19 |
| Arch95<br>8Bf | S-D-Arch-<br>0958-a-S-19 | 958–976  | AATTGGABTCA<br>ACGCCGGR | 47  | 51.5 |          |                                  |
| U519f         | S*-Univ-<br>0519-a-S-18  | 519–536  | CAGCMGCCGCG<br>GTAATWC  | 61  | 54   | U519bf   | S*-Univ-<br>0519-a-S-<br>18      |
| 536r          | S-D-Bact-<br>0519-a-A-18 | 519–536  | CAGCMGCCGCG<br>GTAATWC  | 61  | 54   |          |                                  |
| 518r          | S-D-Bact-<br>0518-a-A-17 | 518–534  | ATTACCGCGGCT<br>GCTGG   | 65  | 52   |          |                                  |
| P518r         | S-D-Bact-<br>0518-a-A-17 | 518–534  | ATTACCGCGGCT<br>GCTGG   | 65  | 52   | B518ar   | S-D-Bact-<br>0518-a-A-<br>17     |
| Primer2       | S-D-Bact-<br>0340-a-A-18 | 518–534  | ATTACCGCGGCT<br>GCTGG   | 65  | 52   |          |                                  |
| 63f           | S-D-Bact-                | 21–41    | CAGGCCTAACA             | 52  | 52   | B43af    | S-D-Bact-                        |

|      |                          |       |                           |    |    |                                          |
|------|--------------------------|-------|---------------------------|----|----|------------------------------------------|
|      | 0043-s-S-21              |       | CATGCAAGTC                |    |    | 0043-a-S-21                              |
|      |                          |       |                           |    |    | 21                                       |
| P63f | S-D-Bact-<br>0042-a-S-21 | 42–62 | CAGGCCTAACA<br>CATGCAAGTC | 52 | 55 |                                          |
| A21f | S-D-Arch-<br>0007-b-S-20 | 7–26  | TTCCGGTTGATC<br>CYGCCGGA  | 60 | 57 | S-D-<br>Arch-<br>A6bf<br>0006-b-S-<br>20 |
| A2f  | S-D-Arch-<br>0007-a-S-20 | 7–26  | TTCCGGTTGATC<br>CYGCCGGA  | 60 | 57 |                                          |

190

191 \*TM: dissociation temperature (°C)

192
